# Supplementary material
Source: ML conference proceedings conference paper supplement (https://openaccess.thecvf.com/content/cvpr_2015/html/Khamis_Learning_an_Efficient_2015_CVPR_paper.html)
Supplement: Supplementary file 1 [file Khamis_Learning_an_Efficient_2015_CVPR_supplemental.zip]

# Learning an Efficient Model of Hand Shape Variation from Depth Images

## Supplementary Material

Sameh Khamis<sup>12</sup>    Jonathan Taylor<sup>2</sup>    Jamie Shotton<sup>2</sup>  
 Cem Keskin<sup>2</sup>    Shahram Izadi<sup>2</sup>    Andrew Fitzgibbon<sup>2</sup>  
<sup>1</sup>University of Maryland    <sup>2</sup>Microsoft Research

In this document, we briefly supplement the material in our paper by providing the parameters settings used as well as the full lifted energy.

### 1. Parameter Settings

We set the weights for the prior terms as  $\lambda_{\text{normal}} = 0.5$ ,  $\lambda_{\text{pose}} = 0.01$ ,  $\lambda_{\text{shape}} = 100$ ,  $\lambda_{\text{arap}} = 40$  and  $\lambda_{\text{skin}} = 1e6$ . For the data term, we set the scaling along the z-axis in the point position error  $\zeta = 0.75$ , and the kernel scaling  $\sigma = 1$  for both the Cauchy kernel and the Geman-McClure kernel.

### 2. Full Lifted Energy

The full lifted energy with all the inner minimizations removed is defined as

$$E'(\Upsilon, \mathcal{B}, \Theta, \mathcal{U}, \mathcal{R}) = \sum_{s=1}^S \left[ \sum_{f=1}^{F_s} \left( \sum_{n=1}^{N_{sf}} E'_{\text{data}}{}^{sf n}(\mathbf{u}_{sf n}, \theta_{sf}, \beta_s; \Upsilon) \right. \right. \\ \left. \left. + \lambda_{\text{pose}} E'_{\text{pose}}{}^{sf}(\theta_{sf}) \right) + \lambda_{\text{shape}} E'_{\text{shape}}{}^{sf}(\beta_s) \right] \\ + \lambda_{\text{arap}} E'_{\text{arap}}(\Upsilon, \mathcal{R}) + \lambda_{\text{skin}} E'_{\text{skin}}(\Upsilon)$$

where

$$E'_{\text{data}}{}^{sf n}(\mathbf{u}, \theta, \beta, \Upsilon) = \\ \rho(\|WQ_{sf n}(\mathbf{x}_{sf n} - \mathcal{S}(\mathbf{u}; \mathcal{P}(\theta; \Phi(\beta, \Upsilon))))\|) \\ + \rho^\perp(\|1 - (\mathbf{n}_{sf n})^\top \mathcal{S}^\perp(\mathbf{u}; \mathcal{P}(\theta; \Phi(\beta, \Upsilon)))\|), \quad (1)$$

$$E'_{\text{pose}}{}^{sf}(\theta_{sf}) = \sum_i \begin{cases} (\theta_{sf}^i - \theta_{\min}^i)^4 & \text{if } \theta_{sf}^i < \theta_{\min}^i \\ (\theta_{\max}^i - \theta_{sf}^i)^4 & \text{if } \theta_{sf}^i > \theta_{\max}^i \\ 0 & \text{otherwise,} \end{cases} \quad (2)$$

$$E'_{\text{shape}}{}^{sf}(\beta_s) = (1 - \beta_s^1)^2 + \sum_{k=2}^K (\beta_s^k)^2, \quad (3)$$

$$E'_{\text{arap}}(\Upsilon, \mathcal{R}) \quad (4) \\ + \sum_{m=1}^M \sum_{n \in \mathcal{N}(m)} \|(\mathbf{v}_n - \mathbf{v}_m) - R_m(\mathbf{v}'_n - \mathbf{v}'_m)\|^2 \\ = \sum_{k=2}^K \sum_{m=1}^M \sum_{n \in \mathcal{N}(m)} \|(\mathbf{v}_n - \mathbf{v}_m)\|^2 \\ + \sum_{b=1}^B \sum_{m \in C_b} \|(\mathbf{v}_m - \mathbf{l}_b) - R_b^\dagger(\mathbf{v}'_m - \mathbf{l}'_b)\|^2 \\ + \sum_{k=2}^K \sum_{b=1}^B \sum_{m \in C_b} \|(\mathbf{v}_m - \mathbf{l}_b)\|^2,$$

and

$$E'_{\text{skin}}(\Upsilon) = \sum_{m=1}^M \left\| \sum_{b=1}^B \alpha_{bm} - 1 \right\|^2. \quad (5)$$
